# Supplementary material for: Machine Learning-Accelerated First-Principles Study of Atomic Configuration and Ionic Diffusion in Li10GeP2S12 Solid Electrolyte
Source: MDPI journal article supplement (doi:10.3390/ma17081810), 2024-04-15
Supplement: s1 [file s1]

# Supporting Information

## Machine Learning-Accelerated First-Principles Study of Atomic Configuration and Ionic Diffusion in $\text{Li}_{10}\text{GeP}_2\text{S}_{12}$ Solid Electrolyte

Changlin Qi<sup>1,2</sup>, Yuwei Zhou<sup>1,3\*</sup>, Xiaoze Yuan<sup>2,4</sup>, Qing Peng<sup>4,5,6\*</sup>, Yong Yang<sup>1,3</sup>,  
Yongwang Li<sup>3</sup>, Xiao-Dong Wen<sup>1,2,3</sup>

1. State Key Laboratory of Coal Conversion, Institute of Coal Chemistry, Chinese Academy of Sciences, Taiyuan, 030001, China
2. University of Chinese Academy of Sciences, No. 19A Yuquan Road, Beijing, 100049, P. R. China
3. National Energy Center for Coal to Clean Fuels, Synfuels China Co., Ltd., Huairou District, Beijing 101400, P. R. China
4. State Key Laboratory of Nonlinear Mechanics, Institute of Mechanics, Chinese Academy of Sciences, Beijing 100190, China
5. Center of Materials Science and Optoelectronics Engineering, University of Chinese Academy of Sciences, Beijing, 100049, China
6. Guangdong Aerospace Research Academy, Guangzhou 511458, China

\*Corresponding authors

E-mail addresses: zhouyuwei\_kt@163.com; pengqing@imech.ac.cn;

**Table S1 Experimental crystal structures of Kamaya et al. and Kuhn et al. The last column is the adjusted occupation used in this article.**

| Atom site                                                                                                                           | Wyckoff position | x         | y           | z           | Occ.      | Adjusted Occ. |
|-------------------------------------------------------------------------------------------------------------------------------------|------------------|-----------|-------------|-------------|-----------|---------------|
| Kamaya et al.'s crystal structure ( $P4_2/nmc$ , $a = b = 8.69407\text{\AA}$ , $c = 12.5994\text{\AA}$ ) <sup>1</sup>               |                  |           |             |             |           |               |
| Li1                                                                                                                                 | 16h              | 0.2563(5) | 0.2718(3)   | 0.1832(3)   | 0.691(5)  | 0.6875        |
| Li2                                                                                                                                 | 4d               | 0         | 1/2         | 0.9446(2)   | 1.0       | 1.0           |
| Li3                                                                                                                                 | 8f               | 0.2463(5) | =x(Li3)     | 0           | 0.643(5)  | 0.625         |
| Li4                                                                                                                                 | — —              | — —       | — —         | — —         | — —       | — —           |
| Ge                                                                                                                                  | 4d               | 0         | 1/2         | 0.6907(6)   | 0.515(5)  | 0.5           |
| P1                                                                                                                                  | 4d               | 0         | 1/2         | 0.6907(6)   | 0.485(5)  | 0.5           |
| P2                                                                                                                                  | 2b               | 0         | 0           | 1/2         | 1.0       | 1.0           |
| S1                                                                                                                                  | 8g               | 0         | 0.184(2)    | 0.410(2)    | 1.0       | 1.0           |
| S2                                                                                                                                  | 8g               | 0         | 0.299(2)    | 0.095(2)    | 1.0       | 1.0           |
| S3                                                                                                                                  | 8g               | 0         | 0.699(2)    | 0.791(2)    | 1.0       | 1.0           |
| Kuhn et al.'s crystal structure (room temperature, $P4_2/nmc$ , $a = b = 8.7187\text{\AA}$ , $c = 12.6385\text{\AA}$ ) <sup>2</sup> |                  |           |             |             |           |               |
| Li1                                                                                                                                 | 16h              | 0.267(3)  | 0.273(3)    | 0.194(2)    | 0.466(18) | 0.5           |
| Li2                                                                                                                                 | 4d               | 0         | 1/2         | 0.9454(12)  | 0.86(6)   | 0.75          |
| Li3                                                                                                                                 | 8f               | 0.248(2)  | =x(Li3)     | 0           | 0.74(5)   | 0.75          |
| Li4                                                                                                                                 | 4c               | 0         | 0           | 0.251(2)    | 0.81(7)   | 0.75          |
| Ge                                                                                                                                  | 4d               | 0         | 1/2         | 0.69154(7)  | 0.5       | 0.5           |
| P1                                                                                                                                  | 4d               | 0         | 1/2         | 0.69154(7)  | 0.5       | 0.5           |
| P2                                                                                                                                  | 2b               | 0         | 0           | 1/2         | 1.0       | 1.0           |
| S1                                                                                                                                  | 8g               | 0         | 0.18857(13) | 0.40707(10) | 1.0       | 1.0           |
| S2                                                                                                                                  | 8g               | 0         | 0.29557(14) | 0.09727(9)  | 1.0       | 1.0           |
| S3                                                                                                                                  | 8g               | 0         | 0.69901(13) | 0.79168(9)  | 1.0       | 1.0           |

**Table S2 The most stable configuration predicted by the LAsou method**

Initial un-relaxed configuration (generated by Supercell package)

| Lattice Parameters |       |        |              |             |              |
|--------------------|-------|--------|--------------|-------------|--------------|
| a (Å)              | b (Å) | c (Å)  | $\alpha$ (°) | $\beta$ (°) | $\gamma$ (°) |
| 8.690              | 8.690 | 12.599 | 90.00        | 90.00       | 90.00        |

  

| Atomic positions |       |       |       |         |       |       |       |
|------------------|-------|-------|-------|---------|-------|-------|-------|
| Element          | a     | b     | c     | Element | a     | b     | c     |
| Li               | 0.256 | 0.272 | 0.183 | S       | 0.000 | 0.184 | 0.410 |
| Li               | 0.744 | 0.728 | 0.183 | S       | 0.316 | 0.500 | 0.910 |
| Li               | 0.728 | 0.744 | 0.817 | S       | 0.000 | 0.816 | 0.410 |
| Li               | 0.272 | 0.256 | 0.817 | S       | 0.684 | 0.500 | 0.910 |
| Li               | 0.272 | 0.744 | 0.817 | S       | 0.500 | 0.316 | 0.090 |
| Li               | 0.756 | 0.772 | 0.317 | S       | 0.816 | 0.000 | 0.590 |
| Li               | 0.728 | 0.256 | 0.817 | S       | 0.500 | 0.684 | 0.090 |
| Li               | 0.744 | 0.272 | 0.183 | S       | 0.184 | 0.000 | 0.590 |
| Li               | 0.772 | 0.756 | 0.683 | S       | 0.000 | 0.299 | 0.095 |
| Li               | 0.256 | 0.728 | 0.183 | S       | 0.201 | 0.500 | 0.595 |
| Li               | 0.228 | 0.244 | 0.683 | S       | 0.000 | 0.701 | 0.095 |
| Li               | 0.000 | 0.500 | 0.945 | S       | 0.799 | 0.500 | 0.595 |
| Li               | 0.000 | 0.500 | 0.445 | S       | 0.500 | 0.201 | 0.405 |
| Li               | 0.500 | 0.000 | 0.555 | S       | 0.701 | 0.000 | 0.905 |
| Li               | 0.500 | 0.000 | 0.055 | S       | 0.500 | 0.799 | 0.405 |
| Li               | 0.254 | 0.746 | 0.500 | S       | 0.299 | 0.000 | 0.905 |
| Li               | 0.754 | 0.754 | 0.000 | S       | 0.000 | 0.699 | 0.791 |
| Li               | 0.746 | 0.254 | 0.500 | S       | 0.801 | 0.500 | 0.291 |
| Li               | 0.254 | 0.254 | 0.500 | S       | 0.000 | 0.301 | 0.791 |
| Li               | 0.746 | 0.746 | 0.500 | S       | 0.199 | 0.500 | 0.291 |
| Ge               | 0.000 | 0.500 | 0.691 | S       | 0.500 | 0.801 | 0.709 |
| Ge               | 0.500 | 0.000 | 0.309 | S       | 0.301 | 0.000 | 0.209 |
| P                | 0.000 | 0.500 | 0.191 | S       | 0.500 | 0.199 | 0.709 |
| P                | 0.500 | 0.000 | 0.809 | S       | 0.699 | 0.000 | 0.209 |
| P                | 0.000 | 0.000 | 0.500 |         |       |       |       |
| P                | 0.500 | 0.500 | 0.000 |         |       |       |       |

Final relaxed configuration (calculated by VASP 5.4.4 package)

| Lattice Parameters |       |        |              |             |              |
|--------------------|-------|--------|--------------|-------------|--------------|
| a (Å)              | b (Å) | c (Å)  | $\alpha$ (°) | $\beta$ (°) | $\gamma$ (°) |
| 8.655              | 8.811 | 13.077 | 90.07        | 89.63       | 89.52        |

| Atomic positions |        |        |        |         |        |        |       |
|------------------|--------|--------|--------|---------|--------|--------|-------|
| Element          | a      | b      | c      | Element | a      | b      | c     |
| Li               | 0.252  | 0.271  | 0.166  | S       | -0.026 | 0.177  | 0.411 |
| Li               | 0.666  | 0.716  | 0.254  | S       | 0.305  | 0.505  | 0.914 |
| Li               | 0.709  | 0.656  | 0.753  | S       | -0.017 | 0.800  | 0.407 |
| Li               | 0.278  | 0.247  | 0.867  | S       | 0.697  | 0.506  | 0.912 |
| Li               | 0.267  | 0.733  | 0.819  | S       | 0.499  | 0.300  | 0.084 |
| Li               | 0.980  | 0.987  | 0.266  | S       | 0.793  | -0.013 | 0.595 |
| Li               | 0.737  | 0.254  | 0.830  | S       | 0.510  | 0.687  | 0.095 |
| Li               | 0.731  | 0.263  | 0.183  | S       | 0.176  | -0.032 | 0.594 |
| Li               | 0.970  | 0.962  | 0.738  | S       | -0.012 | 0.309  | 0.099 |
| Li               | 0.258  | 0.731  | 0.177  | S       | 0.201  | 0.480  | 0.570 |
| Li               | 0.232  | 0.229  | 0.651  | S       | -0.010 | 0.692  | 0.109 |
| Li               | 0.010  | 0.500  | -0.048 | S       | 0.777  | 0.496  | 0.594 |
| Li               | -0.028 | 0.504  | 0.448  | S       | 0.485  | 0.198  | 0.426 |
| Li               | 0.481  | -0.013 | 0.552  | S       | 0.703  | -0.015 | 0.893 |
| Li               | 0.485  | -0.005 | 0.064  | S       | 0.495  | 0.782  | 0.408 |
| Li               | 0.241  | 0.732  | 0.488  | S       | 0.311  | -0.024 | 0.909 |
| Li               | 0.747  | 0.745  | 0.002  | S       | -0.006 | 0.683  | 0.791 |
| Li               | 0.732  | 0.243  | 0.512  | S       | 0.802  | 0.481  | 0.292 |
| Li               | 0.229  | 0.297  | 0.417  | S       | 0.018  | 0.275  | 0.780 |
| Li               | 0.735  | 0.745  | 0.505  | S       | 0.191  | 0.496  | 0.278 |
| Ge               | 0.001  | 0.486  | 0.681  | S       | 0.485  | 0.809  | 0.710 |
| Ge               | 0.487  | 0.002  | 0.318  | S       | 0.279  | 0.004  | 0.214 |
| P                | -0.011 | 0.495  | 0.194  | S       | 0.491  | 0.190  | 0.734 |
| P                | 0.499  | -0.013 | 0.812  | S       | 0.691  | -0.008 | 0.209 |
| P                | -0.015 | -0.013 | 0.502  |         |        |        |       |
| P                | 0.499  | 0.496  | 0.002  |         |        |        |       |

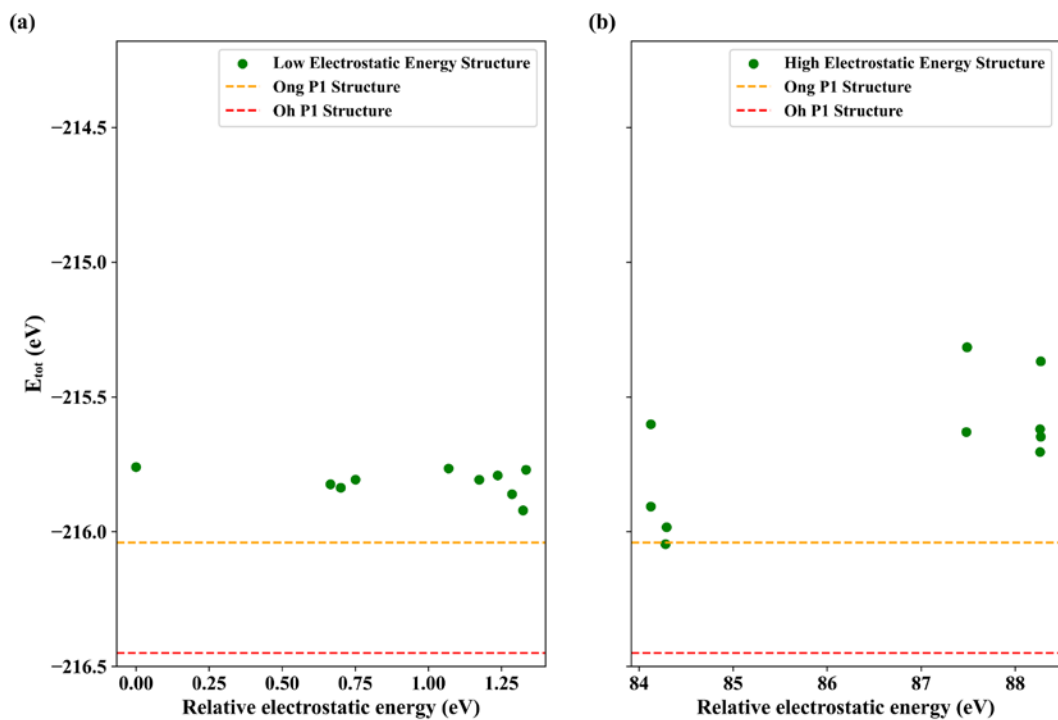

**Figure. S1** The energy distribution of DFT/PBE relaxed configurations screened by the electrostatic energy criterion based on Kuhn et al.'s experimental crystal structures with Li4 sites. (a) The best 10 configurations with the lowest electrostatic energy, (b) the worst 10 configurations with the highest electrostatic energy. Where the horizontal axis represents the relative electrostatic energy (in eV), and the vertical axis represents the total energy of DFT/PBE (in eV). The orange dashed line and red dashed line represent the Ong et al.'s and Oh et al.'s reference configuration, respectively.

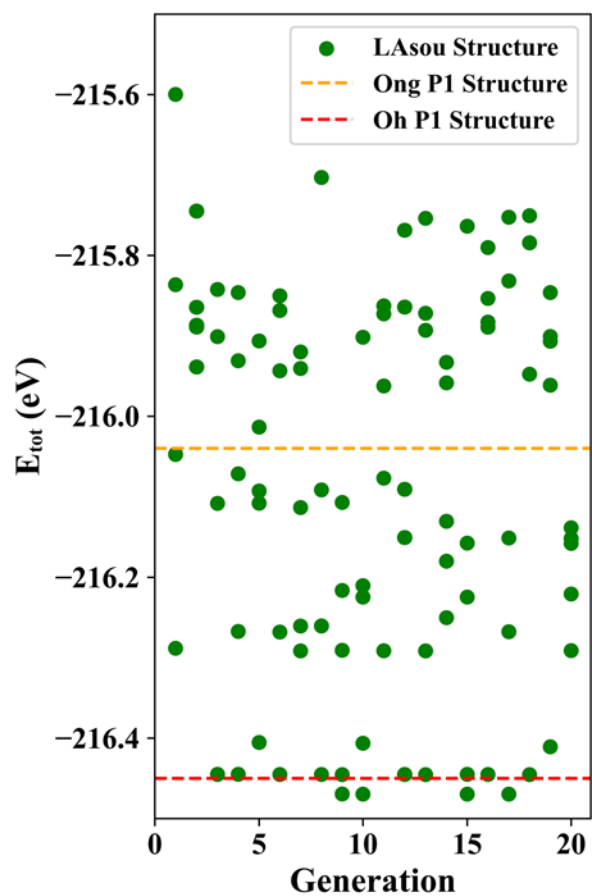

**Figure S2** The energy distribution of LAsou results for the Zig skeleton of Kuhn et al.'s crystal structure, where the fractional occupancies of Li2 and Li4 sites are adjusted from 0.75 and 0.75 to 1.0 and 0.5, respectively.

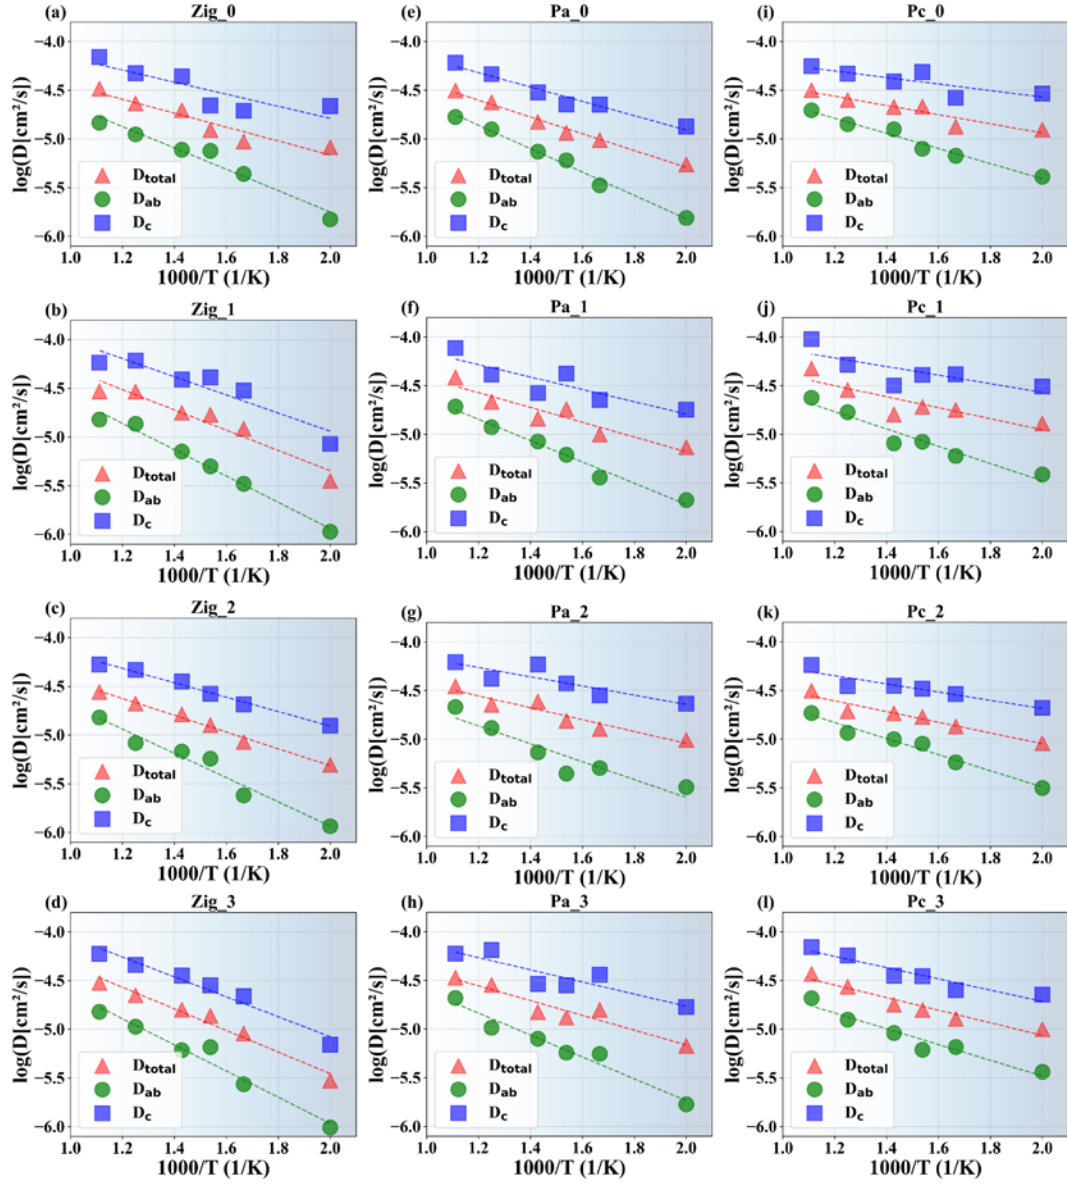

**Figure S3** Arrhenius plots of the diffusion coefficients ( $\log D$ ) as a function of temperature ( $1000/T$ ) for 12 stable configurations from the AIMD simulations.

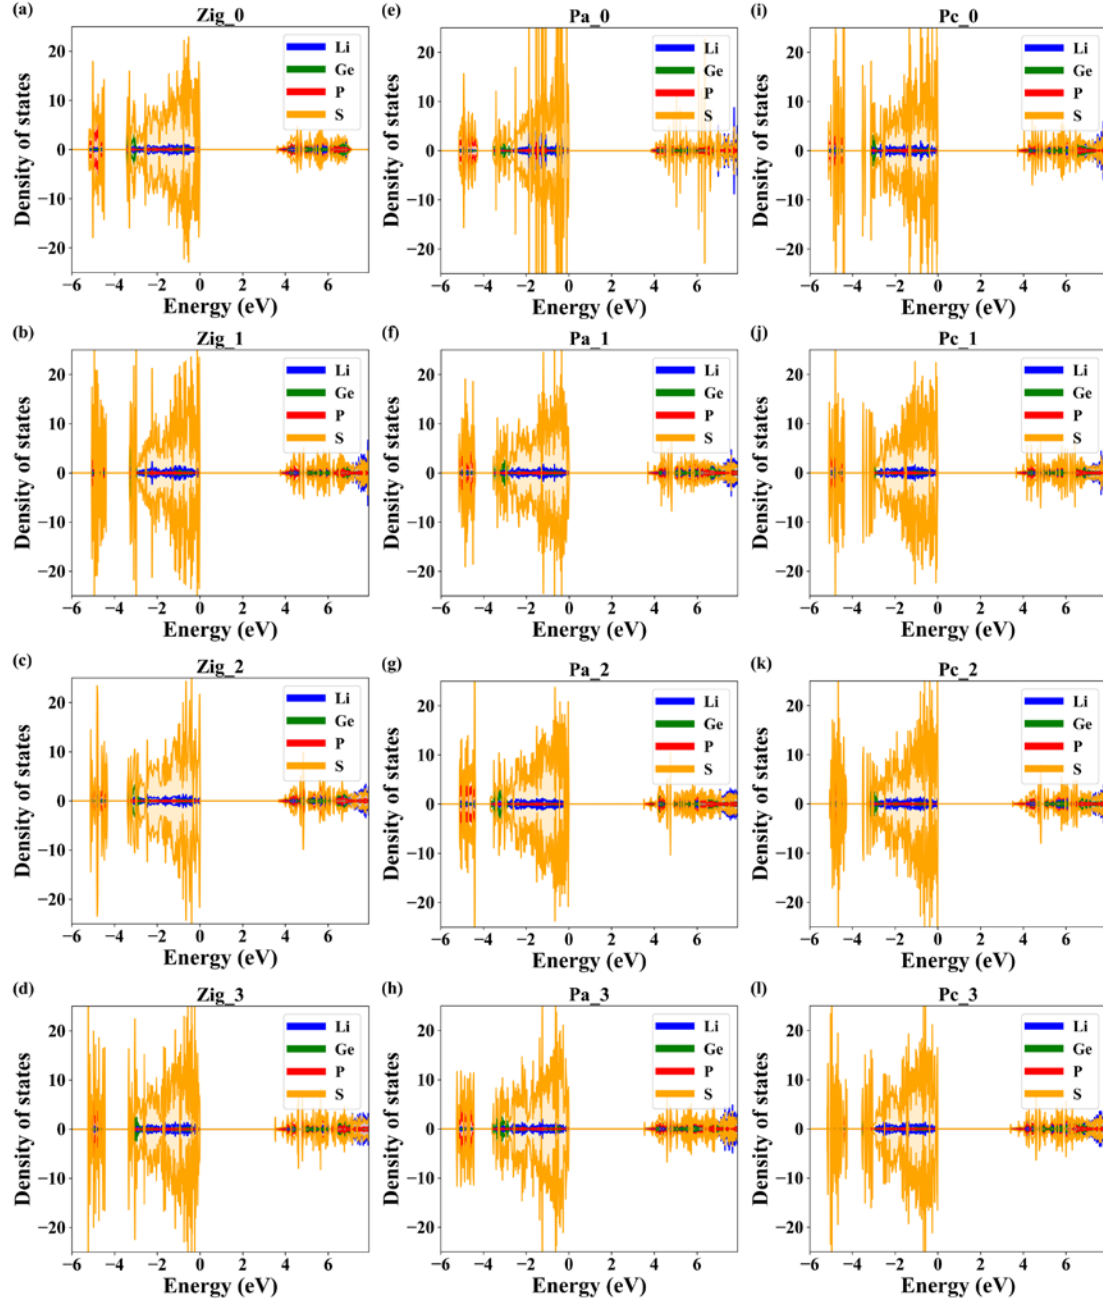

**Figure S4** The partial density of states (PDOS) for 12 stable configurations under DFT/HSE06 functional. The valence band maximum is set at 0 eV.



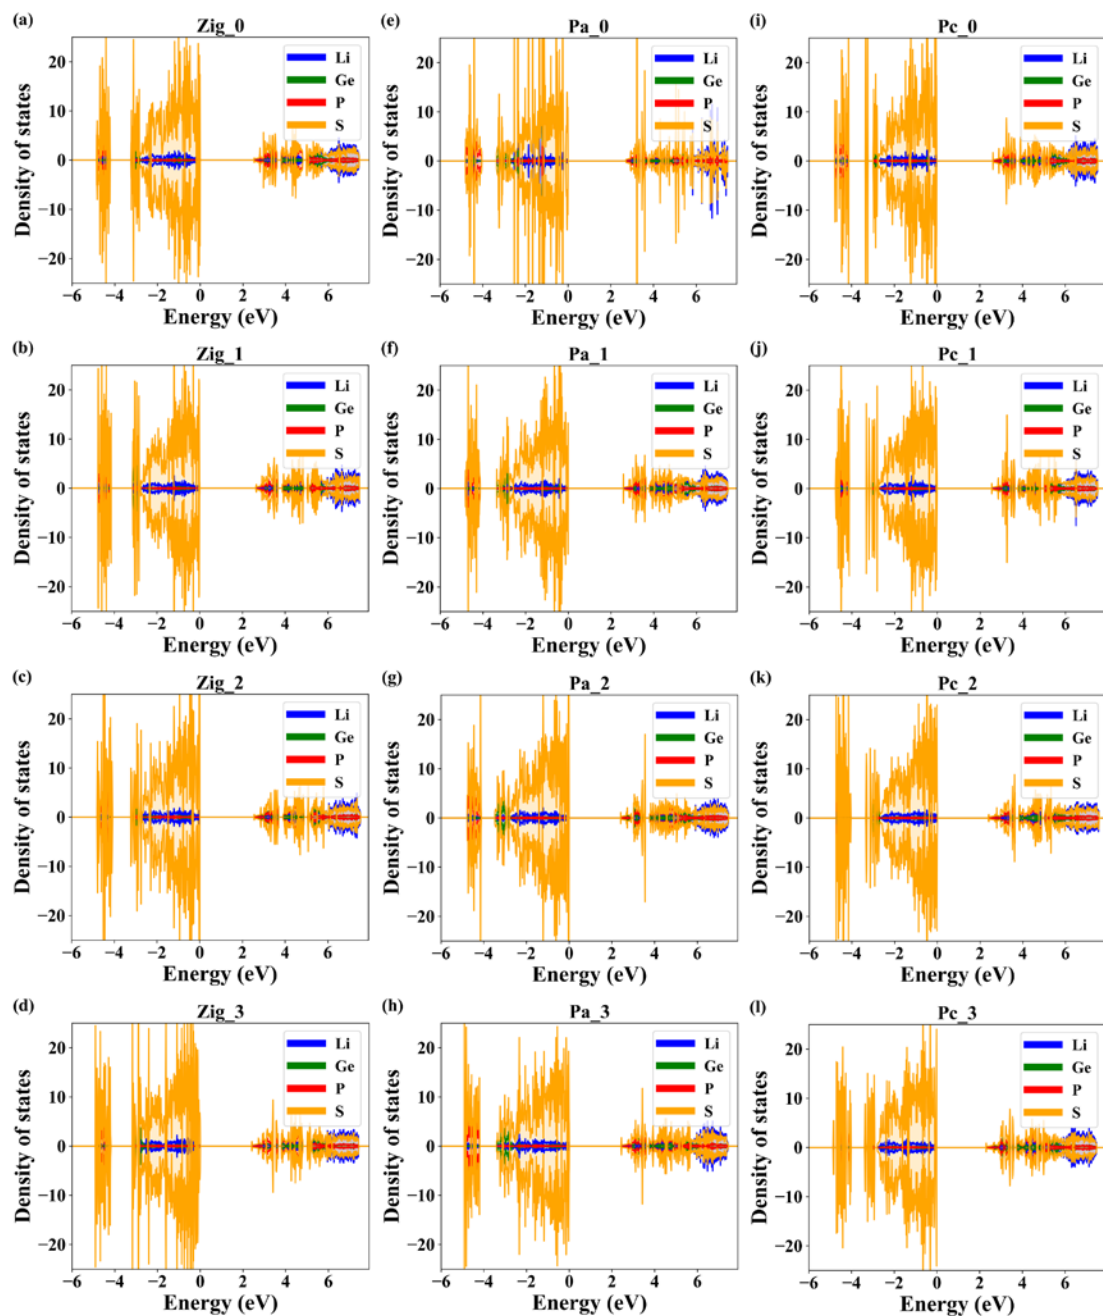

**Figure S5** The partial density of states (PDOS) for 12 stable configurations under DFT/PBE functional. The valence band maximum is set at 0 eV.

#### References:

1. N. Kamaya, K. Homma, Y. Yamakawa, M. Hirayama, R. Kanno, M. Yonemura, T. Kamiyama, Y. Kato, S. Hama, K. Kawamoto and A. Mitsui, *Nat Mater*, 2011, **10**, 682-686.
2. A. Kuhn, J. Kohler and B. V. Lotsch, *Phys Chem Chem Phys*, 2013, **15**, 11620-11622.
